# Supplementary material for: Spectrum of Genetic Diseases in Tunisia: Current Situation and Main Milestones Achieved
Source: MDPI journal article supplement (doi:10.3390/genes12111820), 2021-11-19
Supplement: s1 [file s1]

Table S1 Supplementary data: Mutated genes among Tunisians

| <i>Gene Symbol</i> | Number of Mutations among Tunisians |
|--------------------|-------------------------------------|
| AAAS               | 1                                   |
| AAGAB              | 3                                   |
| ABCA4              | 2                                   |
| ABCD1              | 4                                   |
| ABHD5              | 1                                   |
| ADAMTS13           | 1                                   |
| ADAMTS17           | 1                                   |
| AGA                | 1                                   |
| AGL                | 12                                  |
| AGPAT2             | 2                                   |
| AGXT               | 14                                  |
| AHI1               | 1                                   |
| AICDA              | 3                                   |
| ALB                | 1                                   |
| ALDH5A1            | 1                                   |
| ALDH7A1            | 2                                   |
| ALMS 1             | 1                                   |
| ALPL               | 1                                   |
| ALS2               | 1                                   |
| ALSIN              | 1                                   |
| AMN                | 1                                   |
| APC                | 6                                   |
| APOA5              | 1                                   |
| APOB               | 2                                   |
| APTX               | 2                                   |
| AQP2               | 1                                   |
| AR                 | 3                                   |
| ARSA               | 2                                   |
| ARX                | 2                                   |
| ASAH1              | 1                                   |
| ATM                | 1                                   |
| ATP2A2             | 9                                   |
| ATP6V0A4           | 4                                   |
| ATP6V1B1           | 6                                   |
| ATP7B              | 3                                   |
| ATXN2              | 11                                  |

|                 |    |
|-----------------|----|
| <i>AURKC</i>    | 1  |
| <i>B3GLCT</i>   | 1  |
| <i>B4GALNT1</i> | 2  |
| <i>BBS1</i>     | 5  |
| <i>BBS10</i>    | 1  |
| <i>BBS2</i>     | 2  |
| <i>BBS4</i>     | 2  |
| <i>BBS5</i>     | 3  |
| <i>BBS7</i>     | 1  |
| <i>BCKDHB</i>   | 1  |
| <i>BLM</i>      | 4  |
| <i>BMP15</i>    | 1  |
| <i>BRAF</i>     | 2  |
| <i>BRCA1</i>    | 6  |
| <i>BRCA2</i>    | 5  |
| <i>BSCL2</i>    | 2  |
| <i>BTK</i>      | 2  |
| <i>CA2</i>      | 1  |
| <i>CAPN1</i>    | 1  |
| <i>CAPN3</i>    | 3  |
| <i>CASR</i>     | 2  |
| <i>CD40</i>     | 1  |
| <i>CD40LG</i>   | 4  |
| <i>CDKN2A</i>   | 1  |
| <i>CEP290</i>   | 3  |
| <i>CERKL</i>    | 1  |
| <i>CERS3</i>    | 2  |
| <i>CFI</i>      | 3  |
| <i>CFP</i>      | 1  |
| <i>CFTR</i>     | 25 |
| <i>CHRNE</i>    | 1  |
| <i>CIB2</i>     | 1  |
| <i>CLCN1</i>    | 1  |
| <i>CLDN16</i>   | 3  |
| <i>CNGA3</i>    | 1  |
| <i>CNGB1</i>    | 1  |
| <i>CNGB3</i>    | 1  |
| <i>COL7A1</i>   | 18 |
| <i>CRB1</i>     | 2  |

|                |    |
|----------------|----|
| <i>CSTB</i>    | 1  |
| <i>CTNS</i>    | 2  |
| <i>CTSK</i>    | 1  |
| <i>CUL7</i>    | 3  |
| <i>CYBA</i>    | 1  |
| <i>CYP11B1</i> | 4  |
| <i>CYP1B1</i>  | 5  |
| <i>CYP21A2</i> | 18 |
| <i>CYP24A1</i> | 2  |
| <i>CYP7B1</i>  | 4  |
| <i>DBT</i>     | 1  |
| <i>DDB2</i>    | 1  |
| <i>DFNB31</i>  | 1  |
| <i>DGUOK</i>   | 1  |
| <i>DNAH1</i>   | 1  |
| <i>DOK7</i>    | 1  |
| <i>DYM</i>     | 1  |
| <i>EDNRB</i>   | 1  |
| <i>EIF2AK3</i> | 1  |
| <i>EPB42</i>   | 1  |
| <i>EPM2A</i>   | 1  |
| <i>EPS8</i>    | 1  |
| <i>ERCC2</i>   | 1  |
| <i>ERCC8</i>   | 2  |
| <i>ESRRB</i>   | 1  |
| <i>EXT1</i>    | 1  |
| <i>EYS</i>     | 2  |
| <i>F13A1</i>   | 2  |
| <i>F2</i>      | 1  |
| <i>F5</i>      | 2  |
| <i>F7</i>      | 5  |
| <i>F8</i>      | 12 |
| <i>FAM161A</i> | 1  |
| <i>FANCA</i>   | 5  |
| <i>FAS</i>     | 1  |
| <i>FERMT1</i>  | 1  |
| <i>FGA</i>     | 2  |
| <i>FGB</i>     | 1  |
| <i>FGD4</i>    | 1  |

|                |    |
|----------------|----|
| <i>FGF23</i>   | 1  |
| <i>FKRP</i>    | 4  |
| <i>FLNC</i>    | 3  |
| <i>FMR1</i>    | 1  |
| <i>FOXL2</i>   | 5  |
| <i>FOXP3</i>   | 1  |
| <i>FXN</i>     | 1  |
| <i>G6PC</i>    | 2  |
| <i>G6PD</i>    | 25 |
| <i>GABRD</i>   | 1  |
| <i>GALNS</i>   | 4  |
| <i>GAMT</i>    | 1  |
| <i>GAN</i>     | 5  |
| <i>GBA</i>     | 7  |
| <i>GBA2</i>    | 4  |
| <i>GDAP1</i>   | 9  |
| <i>GJB2</i>    | 21 |
| <i>GJB6</i>    | 2  |
| <i>GJC2</i>    | 1  |
| <i>GNAT2</i>   | 2  |
| <i>GNE</i>     | 1  |
| <i>GP1BB</i>   | 3  |
| <i>GPR98</i>   | 1  |
| <i>GUCY2D</i>  | 10 |
| <i>HBA1</i>    | 4  |
| <i>HBB</i>     | 31 |
| <i>HEXA</i>    | 1  |
| <i>HFE</i>     | 2  |
| <i>HGSNAT</i>  | 2  |
| <i>HOGA1</i>   | 3  |
| <i>HPRT1</i>   | 1  |
| <i>HRPT2</i>   | 1  |
| <i>HSD17B3</i> | 1  |
| <i>HSF4</i>    | 1  |
| <i>HSPG2</i>   | 4  |
| <i>IDUA</i>    | 11 |
| <i>IFNGR1</i>  | 1  |
| <i>IL12B</i>   | 1  |
| <i>IL12RB1</i> | 1  |

|                |    |
|----------------|----|
| <i>IL12RB2</i> | 1  |
| <i>INSR</i>    | 2  |
| <i>IT15</i>    | 1  |
| <i>ITGB2</i>   | 1  |
| <i>KCNJ11</i>  | 1  |
| <i>KIT</i>     | 1  |
| <i>KRT5</i>    | 1  |
| <i>KRT85</i>   | 1  |
| <i>L2HGDH</i>  | 2  |
| <i>LAMA2</i>   | 4  |
| <i>LAMA3</i>   | 1  |
| <i>LAMB2</i>   | 3  |
| <i>LDLR</i>    | 13 |
| <i>LHFPL5</i>  | 1  |
| <i>LIPA</i>    | 1  |
| <i>LMAN1</i>   | 2  |
| <i>LRP5</i>    | 1  |
| <i>LRRK2</i>   | 1  |
| <i>LRTOMT</i>  | 3  |
| <i>MAPRE2</i>  | 1  |
| <i>MCFD2</i>   | 3  |
| <i>MECP2</i>   | 19 |
| <i>MEFV</i>    | 8  |
| <i>MKKS</i>    | 3  |
| <i>MLC1</i>    | 2  |
| <i>MLH1</i>    | 5  |
| <i>MPZ</i>     | 1  |
| <i>MSH2</i>    | 5  |
| <i>MT-CO1</i>  | 3  |
| <i>MT-CO2</i>  | 1  |
| <i>MT-CO3</i>  | 1  |
| <i>MT-CYB</i>  | 2  |
| <i>MT-ND1</i>  | 4  |
| <i>MT-ND5</i>  | 1  |
| <i>MT-RNR1</i> | 3  |
| <i>MT-TE</i>   | 1  |
| <i>MT-TI</i>   | 2  |
| <i>MT-TL1</i>  | 1  |
| <i>MT-TW</i>   | 2  |

|               |   |
|---------------|---|
| <i>MTATP6</i> | 5 |
| <i>MTATP8</i> | 2 |
| <i>MTCO3</i>  | 1 |
| <i>MTTP</i>   | 7 |
| <i>MUTYH</i>  | 3 |
| <i>MYBPC3</i> | 3 |
| <i>MYH7</i>   | 7 |
| <i>MYL3</i>   | 1 |
| <i>MYO15A</i> | 4 |
| <i>MYO7A</i>  | 4 |
| <i>NAGLU</i>  | 2 |
| <i>NAIP</i>   | 3 |
| <i>NCF1</i>   | 1 |
| <i>NCF2</i>   | 2 |
| <i>ND1</i>    | 1 |
| <i>ND5</i>    | 1 |
| <i>NHS</i>    | 1 |
| <i>NLRP7</i>  | 4 |
| <i>NOTCH3</i> | 1 |
| <i>NPHP1</i>  | 1 |
| <i>NPHP4</i>  | 1 |
| <i>NPHS1</i>  | 4 |
| <i>NPHS2</i>  | 2 |
| <i>NROB1</i>  | 2 |
| <i>NR2E3</i>  | 1 |
| <i>PAH</i>    | 8 |
| <i>PAK3</i>   | 1 |
| <i>PARK2</i>  | 1 |
| <i>PAX3</i>   | 4 |
| <i>PCSK9</i>  | 1 |
| <i>PDE6A</i>  | 1 |
| <i>PDE6B</i>  | 3 |
| <i>PEX26</i>  | 1 |
| <i>PGM3</i>   | 5 |
| <i>PHGDH</i>  | 1 |
| <i>PINK1</i>  | 4 |
| <i>PKLR</i>   | 6 |
| <i>PMP22</i>  | 1 |
| <i>POLH</i>   | 5 |

|                 |   |
|-----------------|---|
| <i>POLR3A</i>   | 1 |
| <i>PQBP1</i>    | 1 |
| <i>PRNP</i>     | 1 |
| <i>PROKR2</i>   | 2 |
| <i>PROM1</i>    | 1 |
| <i>PROP1</i>    | 2 |
| <i>PRSS56</i>   | 1 |
| <i>PSEN1</i>    | 1 |
| <i>PTPN11</i>   | 5 |
| <i>PYGM</i>     | 1 |
| <i>QDPR</i>     | 1 |
| <i>RB1</i>      | 3 |
| <i>RECQL4</i>   | 1 |
| <i>REN</i>      | 1 |
| <i>RET</i>      | 1 |
| <i>RFXANK</i>   | 2 |
| <i>RGS6</i>     | 1 |
| <i>ROBO3</i>    | 4 |
| <i>RPE65</i>    | 5 |
| <i>SACS</i>     | 8 |
| <i>SAR1B</i>    | 1 |
| <i>SBF2</i>     | 1 |
| <i>SCN1A</i>    | 1 |
| <i>SCN1B</i>    | 1 |
| <i>SERPINC1</i> | 1 |
| <i>SETX</i>     | 5 |
| <i>SF1</i>      | 1 |
| <i>SGCA</i>     | 1 |
| <i>SGCB</i>     | 1 |
| <i>SGCG</i>     | 3 |
| <i>SGSH</i>     | 7 |
| <i>SH3TC2</i>   | 1 |
| <i>SIX1</i>     | 1 |
| <i>SLC12A3</i>  | 1 |
| <i>SLC14A1</i>  | 1 |
| <i>SLC19A2</i>  | 1 |
| <i>SLC26A4</i>  | 3 |
| <i>SLC29A3</i>  | 1 |
| <i>SLC39A4</i>  | 6 |

|                  |   |
|------------------|---|
| <i>SLC7A7</i>    | 1 |
| <i>SLURP1</i>    | 3 |
| <i>SMN1</i>      | 9 |
| <i>SMPD1</i>     | 1 |
| <i>SOS1</i>      | 2 |
| <i>SPAST</i>     | 2 |
| <i>SPG11</i>     | 4 |
| <i>SPTA1</i>     | 4 |
| <i>SULT2B1</i>   | 1 |
| <i>TACSTD2</i>   | 2 |
| <i>TAT</i>       | 4 |
| <i>TBX22</i>     | 1 |
| <i>TBXAS1</i>    | 2 |
| <i>TGM1</i>      | 2 |
| <i>TGM5</i>      | 1 |
| <i>TMC1</i>      | 4 |
| <i>TMEM126A</i>  | 2 |
| <i>TMEM216</i>   | 1 |
| <i>TMPRSS3</i>   | 1 |
| <i>TMPRSS4</i>   | 1 |
| <i>TNNC1</i>     | 1 |
| <i>TP53</i>      | 1 |
| <i>TPO</i>       | 1 |
| <i>TRIM37</i>    | 1 |
| <i>TRVAAC1-4</i> | 1 |
| <i>TTC8</i>      | 2 |
| <i>TTPA</i>      | 1 |
| <i>TYR</i>       | 3 |
| <i>UBE3A</i>     | 2 |
| <i>UGT1A1</i>    | 1 |
| <i>UROD</i>      | 1 |
| <i>USH1G</i>     | 1 |
| <i>USH2A</i>     | 6 |
| <i>USP9Y</i>     | 4 |
| <i>VDR</i>       | 4 |
| <i>VKORC1</i>    | 3 |
| <i>WNT4</i>      | 1 |
| <i>WT1</i>       | 1 |
| <i>XPA</i>       | 5 |



|                |   |
|----------------|---|
| <i>XPC</i>     | 3 |
| <i>ZFYVE26</i> | 3 |
| <i>ZNF408</i>  | 1 |
| <i>ZNF469</i>  | 1 |
